# Supplementary material
Source: PubMed Central journal article supplement (PMC7233109)
Supplement: NIHMS1574265-supplement-315956_Major_Resources_Table.pdf [file NIHMS1574265-supplement-315956_Major_Resources_Table.pdf]

## Major Resources Table

In order to allow validation and replication of experiments, all essential research materials listed in the Methods should be included in the Major Resources Table below. Authors are encouraged to use public repositories for protocols, data, code, and other materials and provide persistent identifiers and/or links to repositories when available. Authors may add or delete rows as needed.

### Animals (in vivo studies)

| Species      | Vendor or Source | Background Strain | Sex | Persistent ID / URL |
|--------------|------------------|-------------------|-----|---------------------|
| Mus Musculus | Jackson Labs     | C57Bl6J           | M   | Stock #000664       |
|              |                  |                   |     |                     |
|              |                  |                   |     |                     |

### Genetically Modified Animals

|                 | Species      | Vendor or Source      | Background Strain | Other Information                       | Persistent ID / URL |
|-----------------|--------------|-----------------------|-------------------|-----------------------------------------|---------------------|
| Parent - Male   | Mus Musculus | University of Glasgow | C57Bl6J           | Taz knockout (Taz <sup>-/-</sup> ) mice |                     |
| Parent - Female | Mus Musculus | University of Glasgow | C57Bl6J           | Taz <sup>+/-</sup> mice                 |                     |

### Antibodies

| Target antigen                                    | Vendor or Source         | Catalog #   | Working concentration | Lot # (preferred but not required) | Persistent ID / URL                                                                                                                                                                                               |
|---------------------------------------------------|--------------------------|-------------|-----------------------|------------------------------------|-------------------------------------------------------------------------------------------------------------------------------------------------------------------------------------------------------------------|
| Tafazzin                                          | Santa Cruz Biotechnology | sc-365810   | 1:50                  |                                    | <a href="https://www.scbt.com/p/tafazzin-antibody-f-7">https://www.scbt.com/p/tafazzin-antibody-f-7</a>                                                                                                           |
| GFP                                               | Rockland                 | 600-101-215 | 1:250                 |                                    | <a href="https://rockland-inc.com/store/Antibodies-to-GFP-and-Antibodies-to-RFP-600-101-215-O4L_24115.aspx">https://rockland-inc.com/store/Antibodies-to-GFP-and-Antibodies-to-RFP-600-101-215-O4L_24115.aspx</a> |
| Wheat Germ Agglutinin, Alexa Fluor™ 555 Conjugate | Invitrogen               | W32464      | 1:500                 |                                    | <a href="https://www.thermofisher.com/order/catalog/product/W32464#/W32464">https://www.thermofisher.com/order/catalog/product/W32464#/W32464</a>                                                                 |
| Tnni3                                             | Abcam                    | ab56357     | 1:200                 |                                    | <a href="https://www.abcam.com/cardiac-troponin-i-antibody-ab56357.html">https://www.abcam.com/cardiac-troponin-i-antibody-ab56357.html</a>                                                                       |

### DNA/cDNA Clones

| Clone Name       | Sequence | Source / Repository | Persistent ID / URL |
|------------------|----------|---------------------|---------------------|
| pCAG/hTAZ-FL     |          | Addgene             | 139979              |
| pCAG/GFP         |          | Addgene             | 139980              |
| pCAG/Luci        |          | Addgene             | 139981              |
| pSCCAG/hTAZ-FL   |          | Addgene             | 139982              |
| pSCCNT/hTAZ-FL   |          | Addgene             | 139983              |
| pSCMHCK7/hTAZ-FL |          | Addgene             | 139984              |

### Cultured Cells

| Name   | Vendor or Source | Sex (F, M, or unknown) | Persistent ID / URL |
|--------|------------------|------------------------|---------------------|
| HEK293 | ATCC             | unknown                |                     |
|        |                  |                        |                     |

DOI [to be added]

|  |  |  |  |
|--|--|--|--|
|  |  |  |  |
|--|--|--|--|
