# Supplementary material
Source: PubMed Central journal article supplement (PMC7233109)
Supplement: NIHMS1574265-supplement-315956_Uncut_Gel_Blots.pdf [file NIHMS1574265-supplement-315956_Uncut_Gel_Blots.pdf]

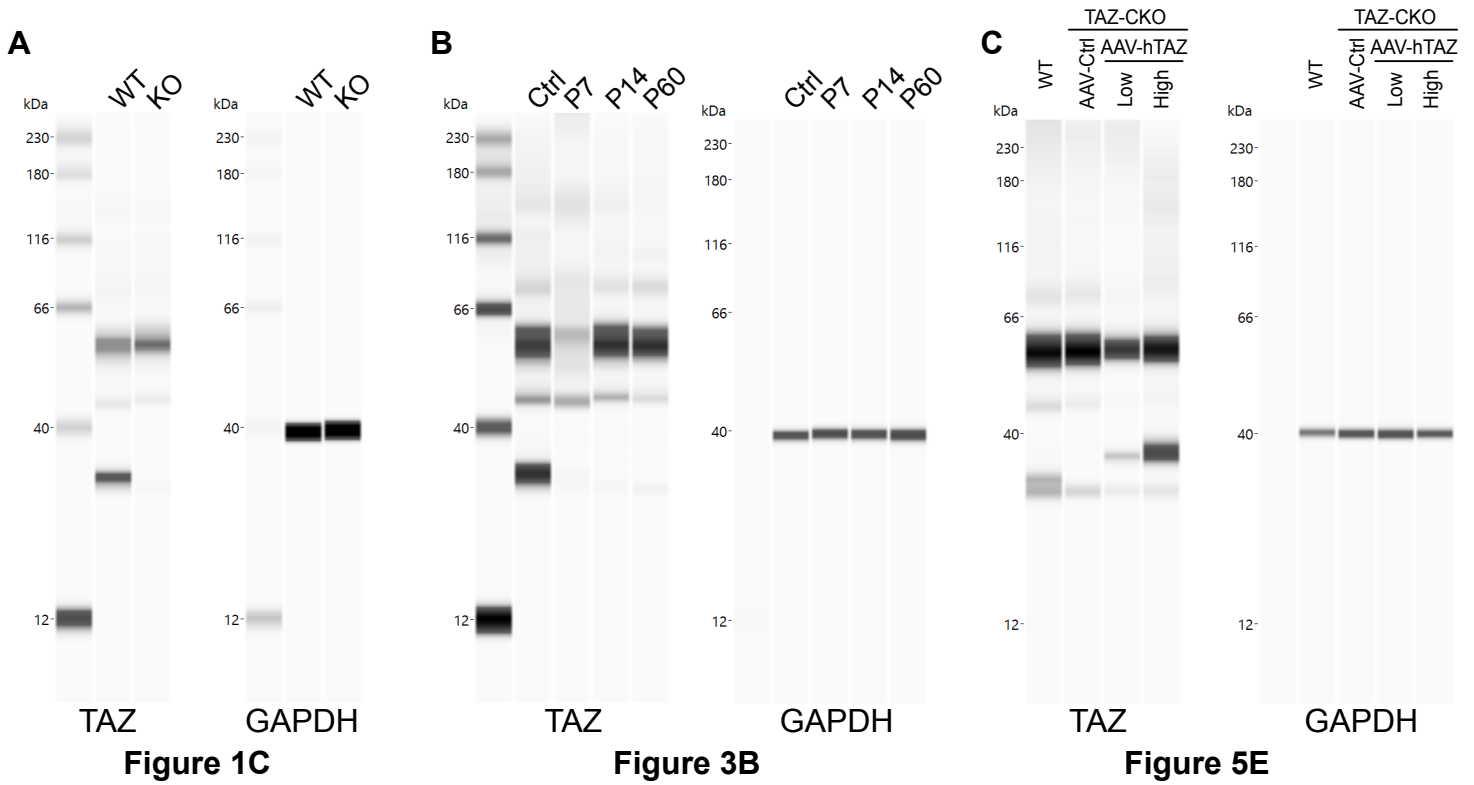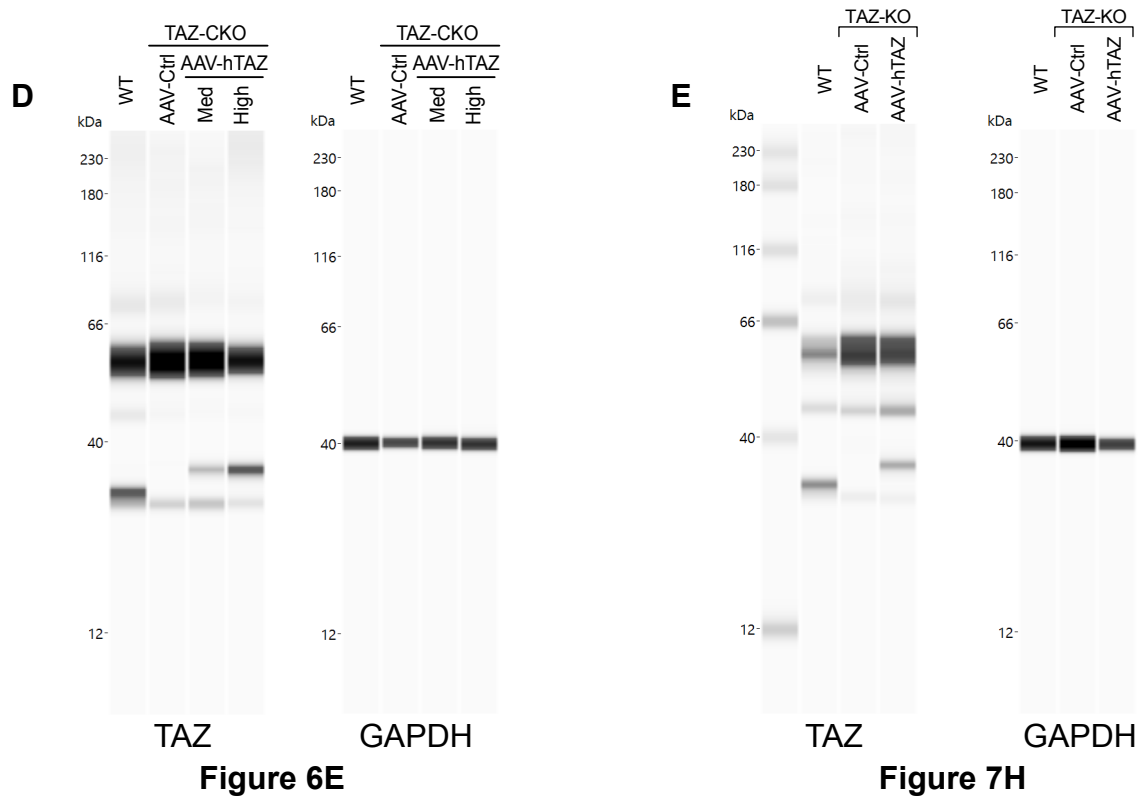

**Original capillary western blot images.** Samples were analyzed using a ProteinSimple WES Capillary Western system. **A.** Fig 1C. **B.** Fig 3B. **C.** Fig 5E. **D.** Fig6E. **E.** Fig 7H.
